# Supplementary material for: Thickness-dependent photoelectrochemical properties of a semitransparent Co3O4 photocathode
Source: publisher site journal article supplement (doi:10.3762/bjnano.9.228), 2018-09-12
Supplement: Additional file 1 [file 2190-4286-9-228-S1.pdf]

# **Supporting Information**

for

## **Thickness-dependent photoelectrochemical properties of a semitransparent Co<sub>3</sub>O<sub>4</sub> photocathode**

Malkeshkumar Patel<sup>1,2</sup> and Joondong Kim<sup>\*1,2</sup>

Address: <sup>1</sup>Department of Electrical Engineering, Incheon National University, 119 Academy Rd. Yeonsu, Incheon, 22012, Republic of Korea and <sup>2</sup>Photoelectric and Energy Device Application Lab (PEDAL), Multidisciplinary Core Institute for Future Energies (MCIFE), Incheon National University, 119 Academy Rd. Yeonsu, Incheon, 22012, Republic of Korea

Email: Joondong Kim - joonkim@incheon.ac.kr

\*Corresponding author

### **Additional experimental data**

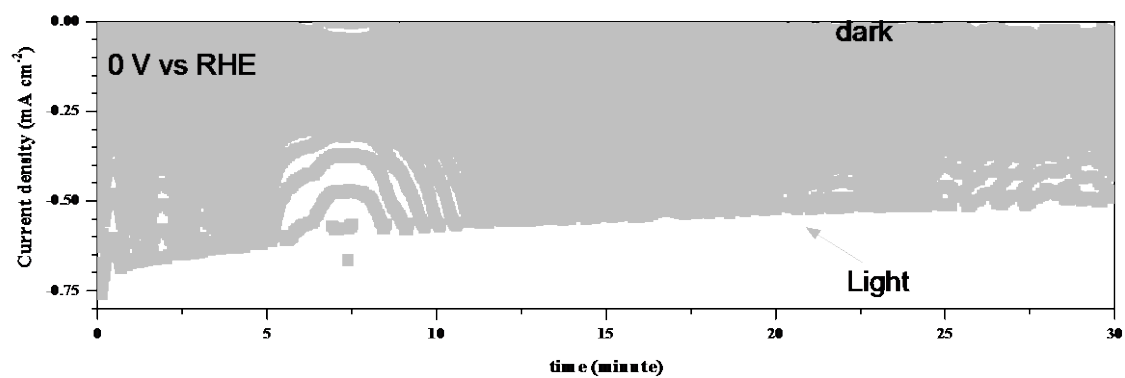

**Figure S1:** Chronoamperometry (current–time characteristic) of the 170 nm thick  $\text{Co}_3\text{O}_4$  photoelectrode at 0 V vs RHE, under pulsed light.

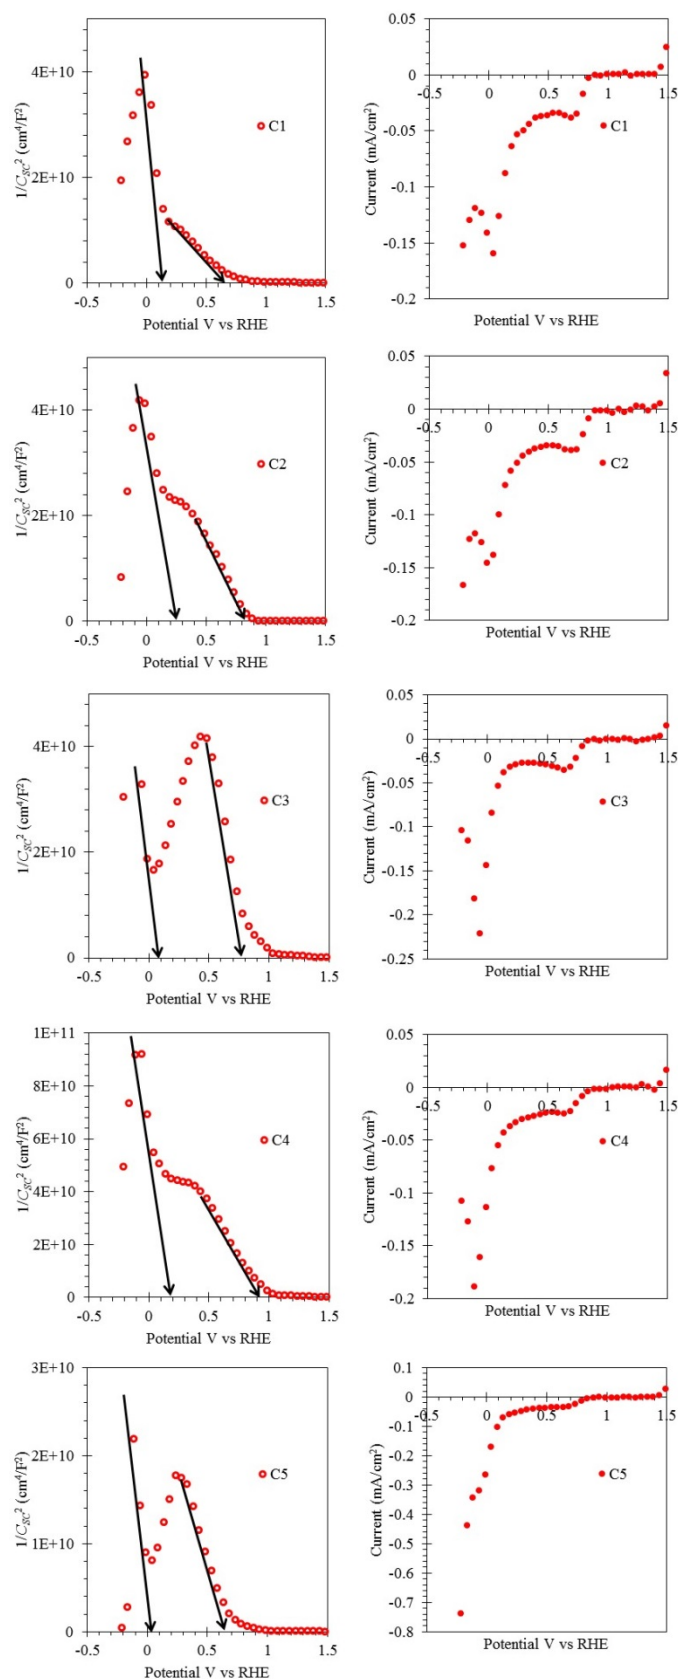

**Figure S2:** Thickness dependent Mott-Schottky characteristics of  $\text{Co}_3\text{O}_4$  samples. Here C1, C2, C3, C4 and C5 refers to the  $\text{Co}_3\text{O}_4$  film thickness of 70 nm, 100 nm, 170 nm, 200 nm, and 230 nm, respectively.

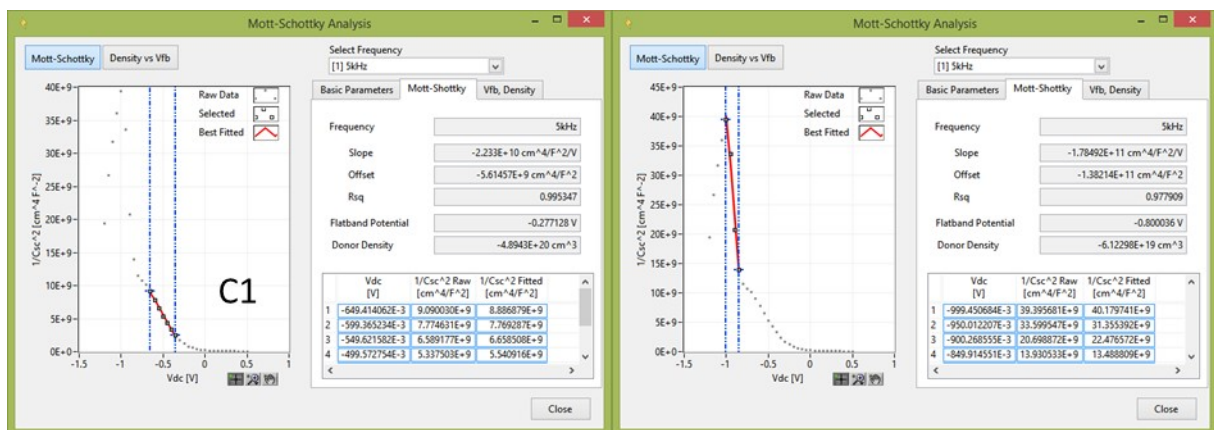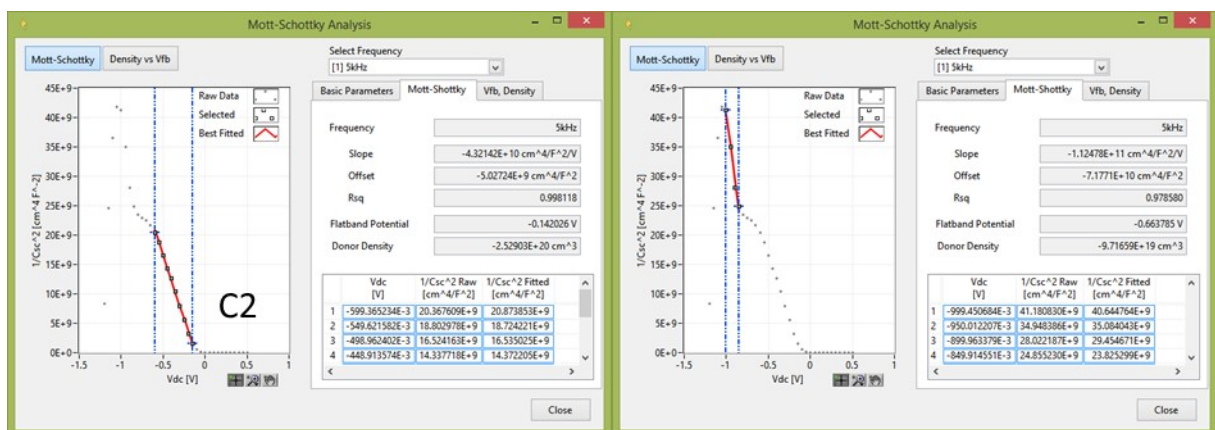

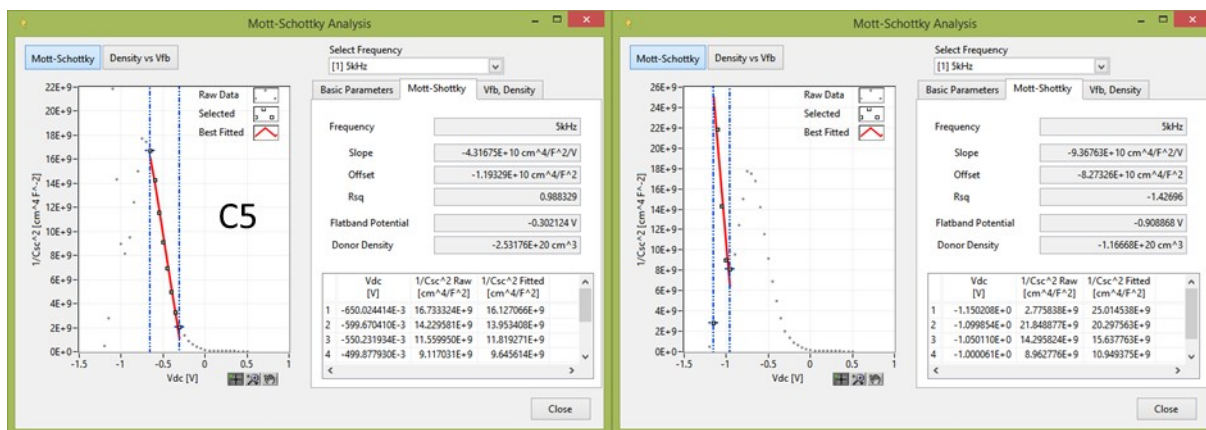

**Figure S3:** Analysis of Mott–Schottky characteristics of  $\text{Co}_3\text{O}_4$  samples. Here C1, C2, C3, C4 and C5 refers to the  $\text{Co}_3\text{O}_4$  film thickness of 70, 100, 170, 200 and 230 nm, respectively.
